# Supplementary material for: High-density genetic map construction and gene mapping of pericarp color in wax gourd using specific-locus amplified fragment (SLAF) sequencing
Source: PubMed Central journal article supplement (PMC4673774; doi:10.1186/s12864-015-2220-y), 2015-12-09

# Haplotype maps of the genetic map.

Chr1

Chr2

Chr3

Chr4

Chr5

Chr6

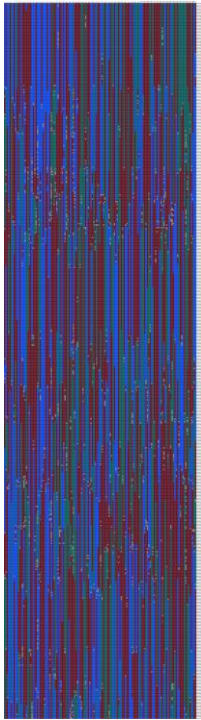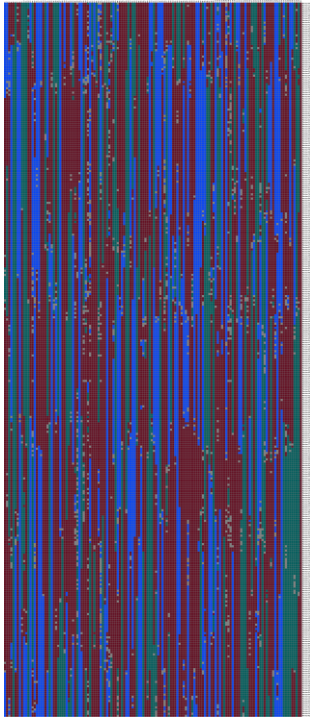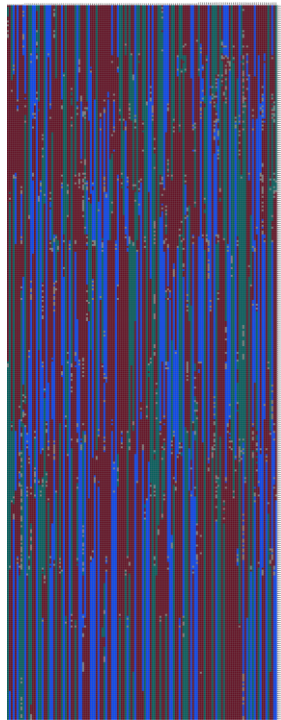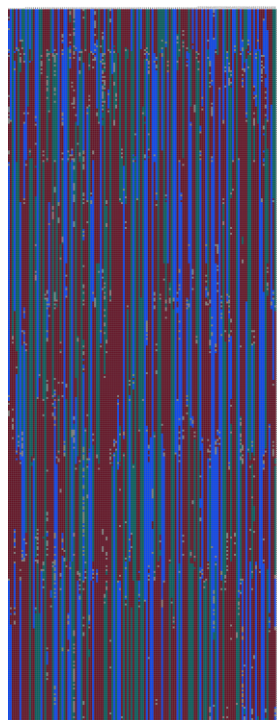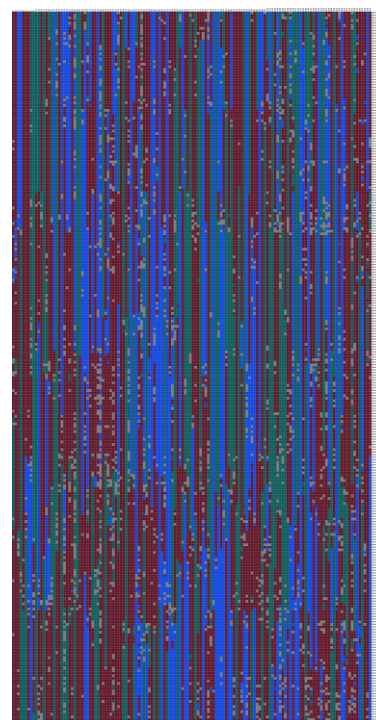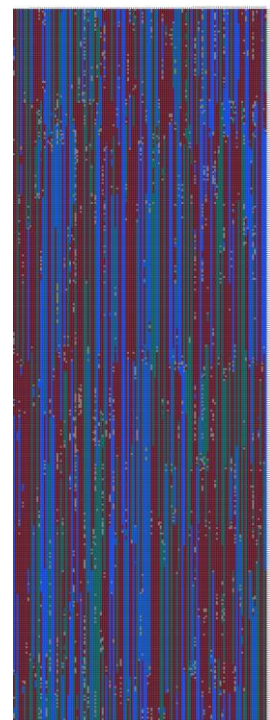



Chr7

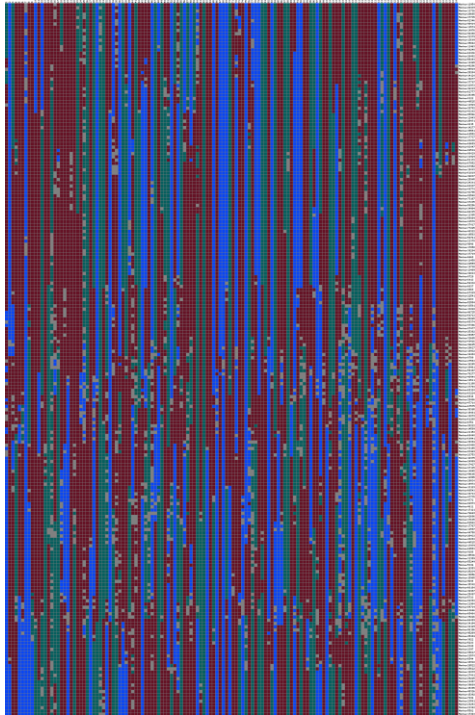

Chr8

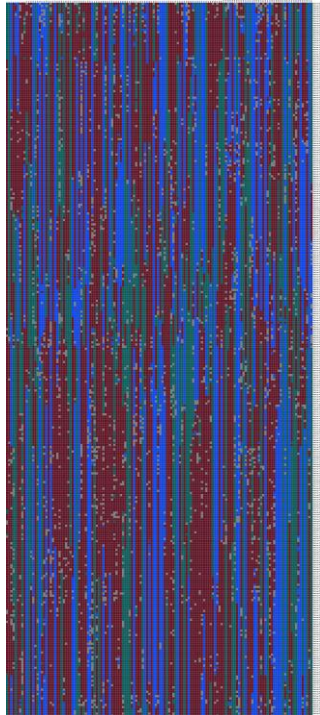

Chr9

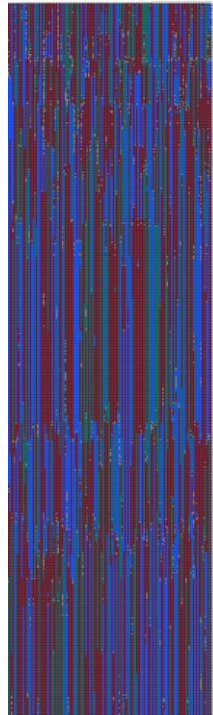

Chr10

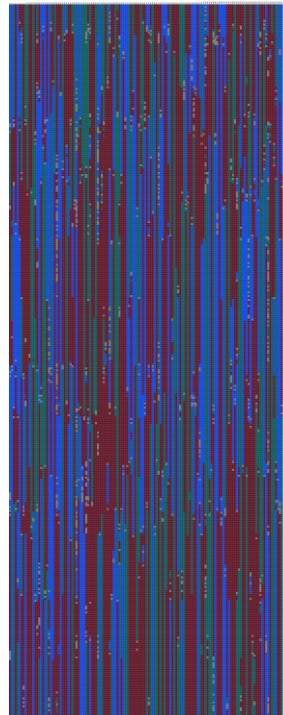

Chr11

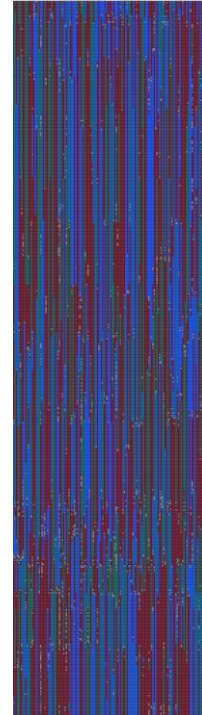

Chr12

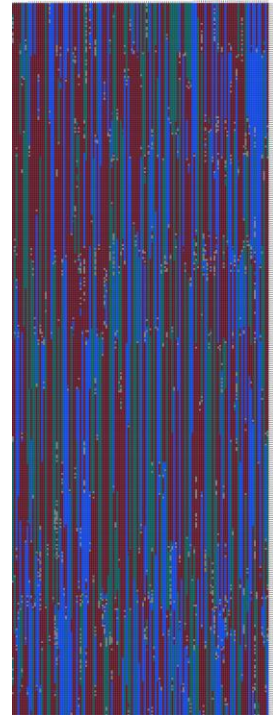

Supplement: 12864_2015_2220_MOESM4_ESM.pdf [file 12864_2015_2220_MOESM4_ESM.pdf]
