# Supplementary material for: High-density genetic map construction and gene mapping of pericarp color in wax gourd using specific-locus amplified fragment (SLAF) sequencing
Source: PubMed Central journal article supplement (PMC4673774; doi:10.1186/s12864-015-2220-y), 2015-12-09

# Heat maps of the genetic map

Chr 1

Chr 2

Chr 3

Chr 4

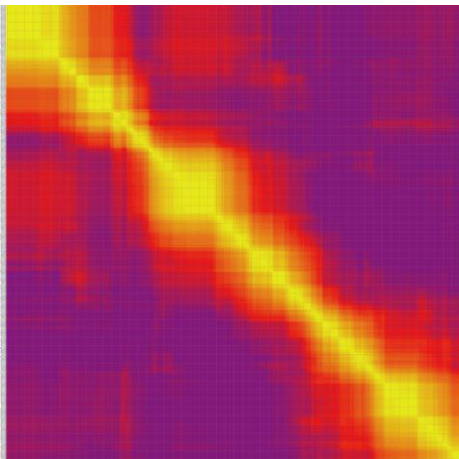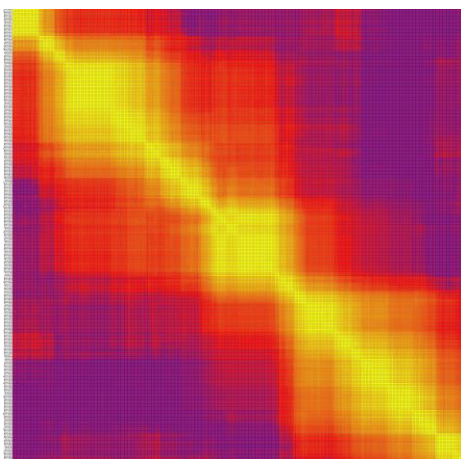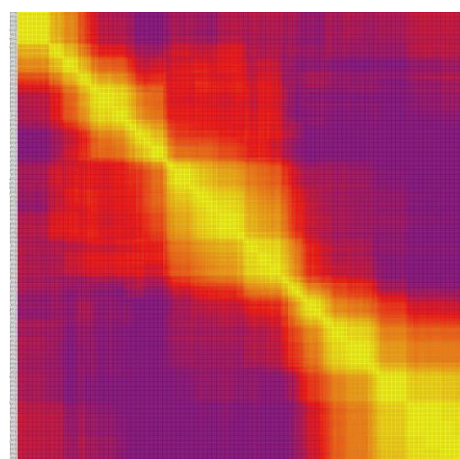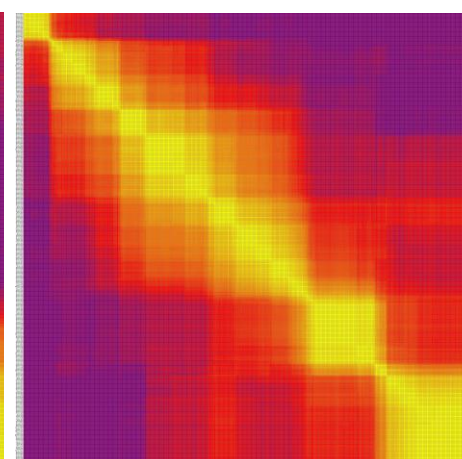

Chr 5

Chr 6

Chr 7

Chr 8

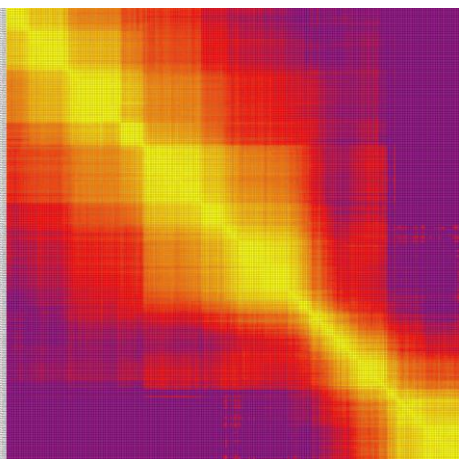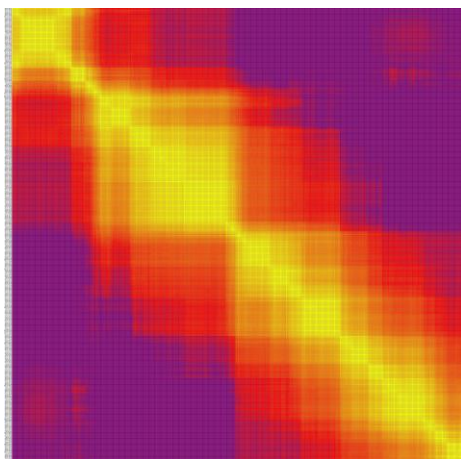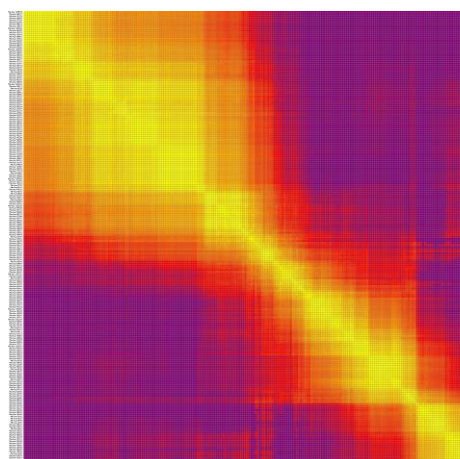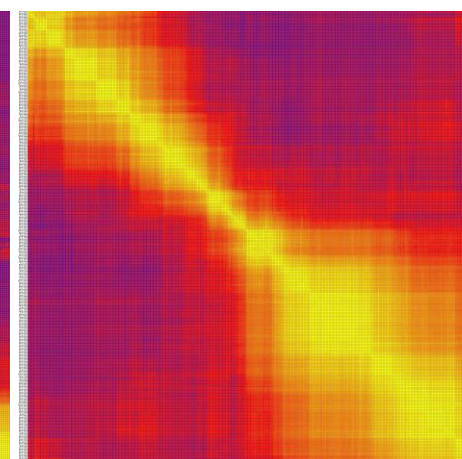

Chr 9

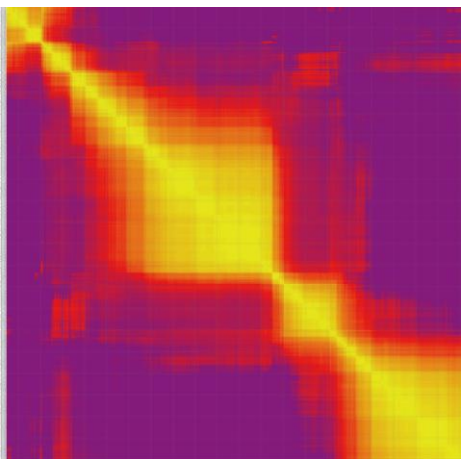

Chr 10

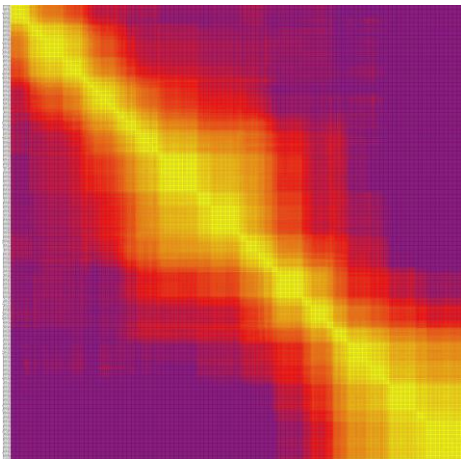

Chr 11

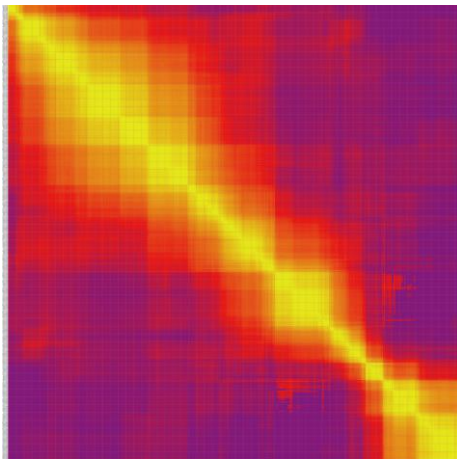

Chr 12

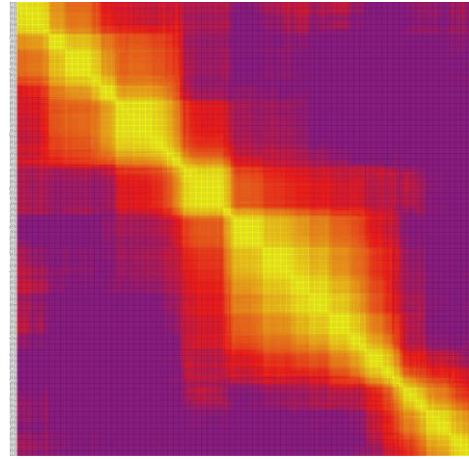

Supplement: 12864_2015_2220_MOESM5_ESM.pdf [file 12864_2015_2220_MOESM5_ESM.pdf]
